# Supplementary material
Source: PubMed Central journal article supplement (PMC5717203)
Supplement: AEM.01660-17_zam999118190s1.pdf [file AEM.01660-17_zam999118190s1.pdf]

1 **Supplements**

2  
3  
4  
5  
6  
7  
8

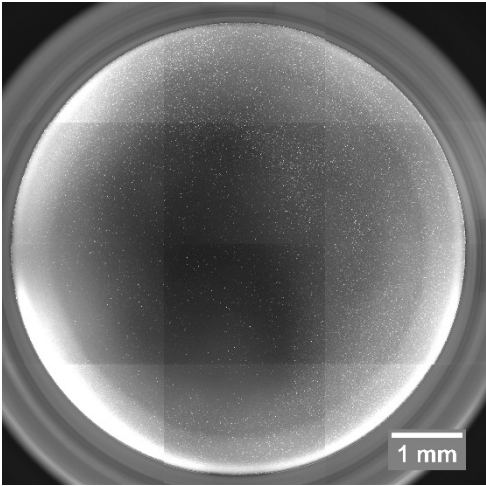

9 **Figure S1.** Overview image of an *E. coli* biofilm in a single well. Fluorescence image of a  
10 SYTO 9 stained biofilm of one UPEC isolate after 48 h of incubation in TSB medium analyzed  
11 using the VideoScan technology. An overview image of a well was composed of 12 smaller  
12 single images, which were captured automatically (4 x/0.16 objective). The biofilm formation  
13 capability of this isolate was equal to a relFI of 0.0722.

14

15 **Table S1.** Occurrence of biofilm-associated genes (genotype), curli and cellulose production  
16 and motility (phenotype)

| Pathotype | Strain ID | PCR for biofilm-associated genes |             |             |              |             |             | Congo red |      | Calcofluor |      | Motility |
|-----------|-----------|----------------------------------|-------------|-------------|--------------|-------------|-------------|-----------|------|------------|------|----------|
|           |           | <i>papC</i>                      | <i>fimH</i> | <i>csgA</i> | <i>agn43</i> | <i>bscA</i> | <i>fliC</i> | 28°C      | 37°C | 28°C       | 37°C | 37°C     |
| HFEC      | 5527      | -                                | +           | +           | -            | +           | +           | r         | b    | +          | -    | +        |
| HFEC      | 5528      | -                                | +           | +           | +            | +           | +           | s         | s    | -          | -    | +        |
| HFEC      | 5529      | -                                | +           | +           | -            | +           | +           | b         | s    | -          | -    | +        |
| HFEC      | 5531      | +                                | +           | +           | +            | +           | -           | s         | s    | -          | -    | +        |
| HFEC      | 5532      | -                                | +           | +           | +            | +           | +           | s         | s    | -          | -    | -        |
| HFEC      | 5535      | +                                | +           | +           | -            | +           | +           | r         | b    | +          | -    | +        |
| HFEC      | 5536      | +                                | +           | +           | -            | +           | +           | r         | r    | +          | +    | +        |
| HFEC      | 5537      | -                                | +           | +           | -            | +           | -           | r         | b    | +          | -    | +        |
| HFEC      | 5538      | +                                | +           | +           | -            | +           | +           | r         | b    | +          | -    | +        |

|      |      |   |   |   |   |   |   |   |   |   |   |   |
|------|------|---|---|---|---|---|---|---|---|---|---|---|
| HFEC | 5539 | - | + | + | + | + | + | r | b | + | - | + |
| HFEC | 5540 | - | + | + | + | + | + | r | b | + | - | + |
| HFEC | 5541 | + | + | + | - | + | + | s | s | - | - | + |
| HFEC | 5542 | + | + | + | + | + | + | s | s | - | - | - |
| HFEC | 5543 | - | + | + | + | + | + | s | s | - | - | + |
| HFEC | 5544 | + | - | + | + | + | + | s | s | - | - | + |
| HFEC | 5545 | + | + | + | + | + | + | s | s | - | - | + |
| HFEC | 5547 | - | + | - | - | - | - | s | s | - | - | + |
| HFEC | 5548 | - | + | + | - | + | + | r | r | + | + | + |
| HFEC | 5549 | - | + | + | + | + | - | s | s | - | - | + |
| HFEC | 5551 | - | - | + | + | + | + | b | b | - | - | + |
| HFEC | 5553 | - | + | + | - | + | + | b | s | - | - | + |
| HFEC | 5554 | + | + | + | + | + | + | b | s | - | - | + |
| HFEC | 5555 | + | + | + | + | + | + | b | s | - | - | + |
| HFEC | 5556 | - | + | + | - | + | + | r | s | + | - | + |
| UPEC | 5228 | - | + | + | + | + | + | r | r | + | + | + |
| UPEC | 5229 | - | + | + | + | + | - | s | s | - | - | - |
| UPEC | 5231 | + | + | + | + | + | + | b | b | - | - | - |
| UPEC | 5232 | - | + | + | - | + | + | s | s | - | - | + |
| UPEC | 5233 | - | + | + | - | + | + | r | b | + | - | + |
| UPEC | 5235 | - | + | + | - | + | - | r | r | + | + | + |
| UPEC | 5237 | - | + | + | - | + | + | r | r | + | + | + |
| UPEC | 5238 | + | + | + | + | + | + | s | s | - | - | - |
| UPEC | 5239 | + | + | + | - | + | + | b | b | - | - | + |
| UPEC | 5240 | + | + | + | + | + | + | s | b | - | - | - |
| UPEC | 5241 | + | + | + | + | + | + | s | b | - | - | + |
| UPEC | 5242 | + | + | + | - | + | + | b | b | - | - | - |
| UPEC | 5243 | + | + | + | + | + | + | b | b | - | - | + |
| UPEC | 5245 | + | + | + | + | + | + | b | b | - | - | + |
| UPEC | 5246 | + | + | + | - | + | - | s | s | - | - | - |
| UPEC | 5247 | + | + | + | - | + | + | s | s | - | - | + |
| UPEC | 5248 | + | + | + | + | + | + | b | b | - | - | - |
| UPEC | 5249 | + | + | + | + | + | + | s | s | - | - | + |
| UPEC | 5250 | - | + | + | - | + | + | r | s | + | - | - |

|      |      |   |   |   |   |   |   |   |   |   |   |   |
|------|------|---|---|---|---|---|---|---|---|---|---|---|
| UPEC | 5253 | - | + | + | + | + | + | s | s | - | - | - |
| UPEC | 5254 | + | + | + | + | + | + | b | b | - | - | + |
| UPEC | 5255 | + | + | + | + | + | + | s | b | - | - | + |
| UPEC | 5256 | + | + | + | + | + | + | s | b | - | - | + |
| UPEC | 5257 | + | + | + | - | + | - | r | r | + | + | + |
| ETEC | 5200 | - | + | + | - | + | + | b | b | - | - | + |
| ETEC | 5201 | - | + | + | - | + | + | b | b | - | - | + |
| ETEC | 5202 | - | + | + | - | + | + | r | r | + | + | + |
| ETEC | 5203 | - | + | + | - | + | + | s | s | - | - | + |
| ETEC | 5204 | - | + | + | - | + | + | b | b | - | - | + |
| ETEC | 5205 | - | + | + | - | + | + | b | b | - | - | + |
| ETEC | 5206 | - | + | + | + | + | + | s | s | - | - | - |
| ETEC | 5286 | - | + | + | - | + | + | b | b | - | - | + |
| ETEC | 5287 | - | + | + | + | + | + | s | s | - | - | + |
| ETEC | 5288 | - | + | + | + | + | + | s | s | - | - | + |
| ETEC | 5637 | - | + | + | - | + | + | b | b | - | - | + |
| ETEC | 5638 | - | + | + | - | + | + | s | s | - | - | - |
| ETEC | 5640 | - | + | + | - | + | + | b | b | - | - | + |
| ETEC | 5641 | - | - | + | - | + | + | s | s | - | - | + |
| ETEC | 5642 | - | + | + | - | + | + | s | s | - | - | - |
| ETEC | 5680 | - | + | + | + | + | + | r | r | + | + | + |
| ETEC | 5682 | - | + | + | - | + | + | b | b | - | - | + |
| ETEC | 5686 | + | + | + | + | + | + | b | s | - | - | + |
| ETEC | 5687 | - | - | + | + | + | + | b | b | - | - | + |
| ETEC | 5688 | - | + | + | - | + | + | s | s | - | - | + |
| ETEC | 5689 | - | + | + | - | + | + | b | s | - | - | + |
| ETEC | 5690 | - | + | + | - | + | + | r | b | + | - | + |
| ETEC | 5691 | - | + | + | - | + | + | r | b | + | - | + |
| ETEC | 5692 | - | - | + | - | + | - | s | s | - | - | - |
| EPEC | 5207 | + | + | + | - | + | + | r | r | + | + | + |
| EPEC | 5208 | - | + | + | - | + | + | s | s | - | - | + |
| EPEC | 5209 | - | + | + | - | + | + | s | s | - | - | + |
| EPEC | 5210 | + | + | + | + | + | + | s | s | - | - | + |
| EPEC | 5211 | + | + | + | - | + | - | b | s | - | - | + |

|      |      |   |   |   |   |   |   |   |   |   |   |   |
|------|------|---|---|---|---|---|---|---|---|---|---|---|
| EPEC | 5212 | - | + | + | - | + | + | b | b | - | - | + |
| EPEC | 5263 | - | + | + | + | + | + | b | s | - | - | + |
| EPEC | 5267 | - | + | + | - | + | - | s | s | - | - | + |
| EPEC | 5268 | + | + | + | - | + | + | r | r | + | + | + |
| EPEC | 5281 | - | + | + | - | + | - | s | s | - | - | + |
| EPEC | 5282 | - | + | + | - | + | - | b | s | - | - | + |
| EPEC | 5285 | + | + | + | - | + | + | r | r | + | + | + |
| EPEC | 5289 | - | + | + | - | + | + | r | b | + | - | + |
| EPEC | 5291 | - | + | + | - | + | + | b | b | - | - | + |
| EPEC | 5292 | - | + | + | - | + | + | b | s | - | - | + |
| EPEC | 5631 | + | + | + | - | + | + | r | s | + | - | + |
| EPEC | 5632 | + | + | + | - | - | - | s | s | - | - | - |
| EPEC | 5633 | - | + | + | - | + | + | b | b | - | - | + |
| EPEC | 5651 | - | + | + | - | + | + | b | s | - | - | + |
| EPEC | 5652 | + | + | + | - | - | + | s | s | - | - | - |
| EPEC | 5653 | - | + | + | - | + | + | b | s | - | - | + |
| EPEC | 5654 | - | + | + | + | + | + | b | b | - | - | + |
| EPEC | 5655 | - | + | + | - | - | - | s | s | - | - | - |
| EPEC | 5656 | - | + | + | - | - | - | s | s | - | - | - |
| EAEC | 5213 | - | - | + | + | + | - | b | b | - | - | + |
| EAEC | 5214 | - | + | + | + | + | + | s | s | - | - | + |
| EAEC | 5215 | + | + | + | + | + | + | s | s | - | - | + |
| EAEC | 5216 | - | + | + | + | + | + | s | s | - | - | + |
| EAEC | 5260 | - | + | + | - | + | + | r | b | + | - | + |
| EAEC | 5264 | - | - | + | + | + | - | s | s | - | - | - |
| EAEC | 5265 | - | + | + | - | + | + | r | r | + | + | - |
| EAEC | 5266 | - | - | + | + | + | - | s | s | - | - | - |
| EAEC | 5269 | - | + | + | + | + | - | s | s | - | - | - |
| EAEC | 5270 | - | - | + | + | + | - | s | s | - | - | + |
| EAEC | 5271 | - | - | + | + | + | - | r | r | + | + | + |
| EAEC | 5272 | - | + | + | - | + | + | r | b | + | - | + |
| EAEC | 5275 | - | - | + | + | + | - | r | r | + | + | + |
| EAEC | 5276 | - | - | + | + | + | - | s | s | - | - | + |
| EAEC | 5277 | + | + | + | + | + | + | b | b | - | - | + |

|      |      |   |   |   |   |   |   |   |   |   |   |   |
|------|------|---|---|---|---|---|---|---|---|---|---|---|
| EAEC | 5278 | - | + | + | + | + | + | s | b | - | - | - |
| EAEC | 5279 | - | + | + | + | + | + | s | s | - | - | + |
| EAEC | 5280 | + | + | + | + | + | - | b | b | - | - | + |
| EAEC | 5634 | - | + | + | - | + | - | r | r | + | + | - |
| EAEC | 5635 | - | - | + | + | + | + | s | b | - | - | - |
| EAEC | 5636 | - | + | + | + | + | + | s | s | - | - | - |
| EAEC | 5639 | - | + | + | + | + | - | b | s | - | - | + |
| EAEC | 5643 | - | + | + | - | + | + | b | b | - | - | + |
| EAEC | 5644 | - | + | + | - | + | - | s | s | - | - | + |
| SAEC | 5147 | - | + | + | + | + | + | r | s | + | - | + |
| SAEC | 5148 | - | + | + | + | + | + | r | b | + | - | - |
| SAEC | 5149 | - | + | + | - | + | - | s | s | - | - | - |
| SAEC | 5150 | - | + | + | + | + | + | b | b | - | - | + |
| SAEC | 5151 | + | + | + | - | + | + | b | b | - | - | - |
| SAEC | 5152 | - | + | + | + | + | + | r | b | + | - | - |
| SAEC | 5153 | + | + | + | + | + | - | r | b | + | - | - |
| SAEC | 5155 | + | + | + | + | + | + | b | b | - | - | + |
| SAEC | 5156 | + | + | + | + | + | + | b | b | - | - | + |
| SAEC | 5157 | + | + | + | - | + | + | r | r | + | + | + |
| SAEC | 5158 | - | + | + | - | + | + | s | b | - | - | + |
| SAEC | 5159 | + | + | + | + | + | - | r | b | + | - | + |
| SAEC | 5160 | + | + | + | + | + | + | b | b | - | - | + |
| SAEC | 5161 | - | + | + | + | + | + | r | r | + | + | - |
| SAEC | 5162 | - | + | + | + | + | + | s | b | - | - | + |
| SAEC | 5163 | - | + | + | - | + | + | b | b | - | - | + |
| SAEC | 5164 | + | + | + | + | + | + | s | b | - | - | - |
| SAEC | 5165 | - | + | + | - | + | + | r | s | + | - | + |
| SAEC | 5166 | - | + | + | + | + | + | s | s | - | - | - |
| SAEC | 5167 | - | + | + | - | + | + | b | b | - | - | + |
| SAEC | 5168 | + | + | + | + | + | + | b | b | - | - | + |
| SAEC | 5169 | + | + | + | - | + | + | s | s | - | - | + |
| SAEC | 5170 | + | + | + | - | + | + | r | r | + | + | + |
| SAEC | 5171 | + | + | + | + | + | - | s | s | - | - | - |
| CAEC | 5180 | - | + | + | - | + | + | s | s | - | - | + |

|      |      |   |   |   |   |   |   |   |   |   |   |   |
|------|------|---|---|---|---|---|---|---|---|---|---|---|
| CAEC | 5181 | - | + | + | + | + | - | b | b | - | - | + |
| CAEC | 5182 | - | + | + | + | + | + | r | r | + | + | + |
| CAEC | 5183 | + | + | + | - | - | + | r | r | + | + | + |
| CAEC | 5184 | - | + | + | - | - | - | s | s | - | - | - |
| CAEC | 5185 | + | + | + | - | + | + | s | s | - | - | + |
| CAEC | 5186 | + | + | + | - | + | + | r | r | + | + | + |
| CAEC | 5187 | + | + | + | - | + | + | s | s | - | - | + |
| CAEC | 5188 | - | + | + | - | + | + | r | r | + | + | + |
| CAEC | 5189 | - | + | + | - | + | + | b | s | - | - | + |
| CAEC | 5190 | - | + | + | - | + | + | b | s | - | - | + |
| CAEC | 5191 | - | + | + | - | + | + | b | b | - | - | + |
| CAEC | 5192 | - | + | + | + | + | + | s | s | - | - | + |
| CAEC | 5193 | + | + | + | - | + | + | r | r | + | + | + |
| CAEC | 5194 | - | + | + | - | + | - | b | s | - | - | - |
| CAEC | 5195 | - | - | + | + | + | + | s | s | - | - | + |
| CAEC | 5196 | - | + | + | - | + | - | r | b | + | - | + |
| CAEC | 5198 | - | - | + | - | + | + | s | b | - | - | + |
| CAEC | 5199 | - | + | + | - | + | - | b | s | - | - | + |
| AFEC | 5559 | - | + | + | - | + | + | s | s | - | - | + |
| AFEC | 5560 | + | + | + | + | + | - | b | s | - | - | - |
| AFEC | 5561 | - | + | + | - | + | + | b | b | - | - | + |
| AFEC | 5562 | + | + | + | + | + | + | s | b | - | - | + |
| AFEC | 5563 | - | + | + | - | + | + | s | s | - | - | - |
| AFEC | 5564 | - | + | + | + | + | - | s | b | - | - | + |
| AFEC | 5565 | - | + | + | - | + | + | r | r | + | + | - |
| AFEC | 5566 | - | + | + | - | + | + | b | b | - | - | - |
| AFEC | 5567 | + | + | + | - | + | + | b | b | - | - | - |
| AFEC | 5568 | + | + | + | - | + | + | b | b | - | - | + |
| AFEC | 5569 | - | + | + | + | + | + | r | r | + | + | + |
| AFEC | 5570 | - | + | + | - | + | + | r | s | + | - | + |
| AFEC | 5571 | - | + | + | + | + | - | b | s | - | - | - |
| AFEC | 5572 | + | + | + | - | + | + | r | r | + | + | + |
| AFEC | 5573 | - | + | + | - | + | + | r | b | + | - | + |
| AFEC | 5574 | - | + | + | - | + | - | s | s | - | - | + |

|      |      |   |   |   |   |   |   |          |          |   |   |   |
|------|------|---|---|---|---|---|---|----------|----------|---|---|---|
| AFEC | 5575 | - | + | + | + | + | - | <b>b</b> | <b>s</b> | - | - | - |
| AFEC | 5576 | - | + | + | - | + | - | <b>b</b> | <b>s</b> | - | - | + |
| AFEC | 5577 | - | + | + | + | + | + | <b>r</b> | <b>r</b> | + | + | + |
| AFEC | 5578 | - | + | + | - | + | + | <b>s</b> | <b>b</b> | - | - | + |
| AFEC | 5579 | - | + | + | + | + | + | <b>s</b> | <b>s</b> | - | - | - |
| AFEC | 5580 | + | + | + | - | + | + | <b>b</b> | <b>b</b> | - | - | - |
| AFEC | 5581 | + | + | + | - | + | + | <b>s</b> | <b>s</b> | - | - | - |
| AFEC | 5582 | + | + | + | - | + | + | <b>r</b> | <b>s</b> | + | - | + |

---

17 r-rdar morphotype; b-bdar morphotype; s-saw morphotype
